# Supplementary material for: Life cycle assessment of CO2-based C1-chemicals
Source: Royal Society of Chemistry journal article supplement (doi:10.1039/c6gc02852g), 2017-01-01
Supplement: c6gc02852g1.pdf [file c6gc02852g1.pdf]

# Life Cycle Assessment of CO<sub>2</sub>-based C1-Chemicals

André Sternberg, Christian M. Jens and André Bardow

*Chair of Technical Thermodynamics, RWTH Aachen University*

*andre.bardow@ltt.rwth-aachen.de*

## Supporting Information

### Contents

- S1. Overview of process concepts for C1-chemicals from CO<sub>2</sub>
- S2. Input and output data for processes analyzed in main text
- S3. LCA data
- S4. Breakdown of fossil depletion impacts for CO<sub>2</sub>-based processes
- S5. Breakdown of global warming and fossil depletion impacts for fossil-based processes
- S6. Maximum impact reductions for global warming including CO<sub>2</sub> supply from CCS
- S7. Maximum environmental impact reductions for alternative natural gas supply
- S8. Calculation details for CO<sub>2</sub>-based process for formic acid (Jens and co-workers)
- S9. References

## S1. Overview of process concepts for C1-chemicals from CO<sub>2</sub>

Table S1: CO<sub>2</sub>-based processes for C1-chemicals (processes in *italics* are not considered in main text due to missing data, the products of the processes in *italics* are used as input for Fischer-Tropsch reaction); PC-process concept, PS-process simulation

| Product                                             | ID                 | Reaction                                                                                                                               | Product separation                                                                                                                                                                                                                                                                       | Comment                                 |
|-----------------------------------------------------|--------------------|----------------------------------------------------------------------------------------------------------------------------------------|------------------------------------------------------------------------------------------------------------------------------------------------------------------------------------------------------------------------------------------------------------------------------------------|-----------------------------------------|
| HCOOH                                               | Ia                 | @ 93 °C and 105 bar                                                                                                                    | The stripping is performed at 3 bar before formic acid (purity: 85 wt %) is recovered at the top of the reactive distillation column.                                                                                                                                                    | REF 1                                   |
|                                                     | Ib                 | @ 50 °C and 94 bar                                                                                                                     | First, methanol, water and residual carbon monoxide are removed by distillation. Then, the amine-formic-acid adduct is decomposed in a reactive distillation at 200 mbar and 180 °C to liberate the pure formic acid, which is recovered at the top of the reactive distillation column. | PC: REF 2<br>PS: REF 3                  |
| CO<br>via rWGS                                      | II                 | in electrically heated reactor; heterogeneous catalyst<br>@ 230 °C and 25 bar in fixed bed reactor with WGS catalyst and water sorbent | CO <sub>2</sub> removal by amine scrubbing; H <sub>2</sub> removal by liquid methane washing; recycling of CO <sub>2</sub> and H <sub>2</sub><br><i>Water is removed in reactor; CO is only product; no product separation required</i>                                                  | REF 4<br><i>PC: REF 5<br/>PS: REF 6</i> |
|                                                     |                    | @ 650 °C and 1 bar; ZnAl <sub>2</sub> O <sub>4</sub> catalyst                                                                          | <i>Partial removal of H<sub>2</sub> by PSA</i>                                                                                                                                                                                                                                           | REF 7                                   |
|                                                     | Syngas<br>via rWGS | @ 900 °C and 25 bar; additional use of steam; recycle from FT                                                                          | <i>H<sub>2</sub>O removal</i>                                                                                                                                                                                                                                                            | REF 8                                   |
|                                                     |                    |                                                                                                                                        |                                                                                                                                                                                                                                                                                          |                                         |
| CO & H <sub>2</sub><br>via DRM<br>Syngas<br>via DRM | III                | in electrically heated reactor; heterogeneous catalyst<br>@ 1000 °C and 4 bar                                                          | CO <sub>2</sub> removal by amine scrubbing; H <sub>2</sub> removal by liquid methane washing; purification of H <sub>2</sub> by PSA; CO <sub>2</sub> recycling                                                                                                                           | REF 4<br><i>REF 9</i>                   |
|                                                     |                    |                                                                                                                                        |                                                                                                                                                                                                                                                                                          |                                         |
| Methanol                                            | IVa                | @ 220 °C and 50 bar                                                                                                                    | Separation of gaseous (CO, CO <sub>2</sub> and H <sub>2</sub> ) and condensable (CH <sub>3</sub> OH, H <sub>2</sub> O) compounds by flash; Recycling of gaseous compounds; separation of CH <sub>3</sub> OH and H <sub>2</sub> O in distillation                                         | REF 10                                  |
|                                                     | IVb                | @ 210 °C and 78 bar in fixed bed adiabatic reactor                                                                                     | Similar to IVa                                                                                                                                                                                                                                                                           | REF 11                                  |
|                                                     | IVc                | @ 250 °C and 50 bar                                                                                                                    | Similar to IVa, but additional stripping unit after flash: feed hydrogen (saturated with water) flows in counter-current with the condensed mixture from flash (CH <sub>3</sub> OH, H <sub>2</sub> O)                                                                                    | REF 12                                  |
| Methane                                             | Va                 | @ 280 °C and 8 bar with heterogeneous catalyst                                                                                         | Condensation of water                                                                                                                                                                                                                                                                    | REF 13                                  |
|                                                     | Vb                 | @ 300 °C and 5 bar                                                                                                                     | CO <sub>2</sub> removal by amine scrubbing; H <sub>2</sub> removal by membranes; recycling of CO <sub>2</sub> and H <sub>2</sub> to reactor                                                                                                                                              | REF 14                                  |

## S2. Input and output data for processes analyzed in main text

Data of all processes is presented for CO<sub>2</sub> and hydrogen inlet pressures of 1 bar. If data of original process simulations refers to other inlet pressures, the electricity demand is adjusted. In this case, the original electricity demand is presented in parentheses.

The CO<sub>2</sub> emissions include the CO<sub>2</sub> that is not converted during the reaction and the CO<sub>2</sub> that is produced during the combustion of carbon-containing by-products. The CO<sub>2</sub> emissions do not include indirect CO<sub>2</sub> emissions, e.g., from electricity and heat supply.

**Table S2: CO<sub>2</sub>-based formic acid production (values per kg pure formic acid)**

| Process                               | Inputs         |                 |             |       | Emissions       |
|---------------------------------------|----------------|-----------------|-------------|-------|-----------------|
|                                       | H <sub>2</sub> | CO <sub>2</sub> | Electricity | Steam | CO <sub>2</sub> |
|                                       | kg             | kg              | kWh         | kWh   | kg              |
| Ia (Pérez-Fortes et al.) <sup>1</sup> | 0.071          | 0.988           | 0.48 (0.35) | 3.27  | 0.032           |
| Ib (Jens et al.) <sup>3</sup>         | 0.045          | 0.985           | 0.53        | 2.51  | 0.029           |

Ia) original inlet pressures: p H<sub>2</sub> = 30 bar & p CO<sub>2</sub> = 1 bar

Ib) see Section S8 for further information

The process of Perez-Fortes and co-workers produces formic acid with a purity of 85 wt% and the process of Jens and co-workers produces 99 mol% formic acid. For the comparison, the results of both processes simulations are converted to “per kg pure formic acid”.

**Table S3: CO<sub>2</sub>-based carbon monoxide production via rWGS (values per kg carbon monoxide)**

| Process                                                                | Inputs         |                 |             |       | Emissions       |
|------------------------------------------------------------------------|----------------|-----------------|-------------|-------|-----------------|
|                                                                        | H <sub>2</sub> | CO <sub>2</sub> | Electricity | Steam | CO <sub>2</sub> |
|                                                                        | kg             | kg              | kWh         | kWh   | kg              |
| IIa – electrically heated reactor (CO <sub>2</sub> RRECT) <sup>4</sup> | 0.072          | 1.581           | 1.54        | 0.71  | 0.010           |
| IIb – reactor heated by steam                                          | 0.072          | 1.581           | 1.13        | 1.11  | 0.010           |

**Table S4: CO<sub>2</sub>-based carbon monoxide production via DRM (values per kg carbon monoxide)**

| Process                                                                 | Inputs          |                 |             |       | Outputs        | Emissions       |
|-------------------------------------------------------------------------|-----------------|-----------------|-------------|-------|----------------|-----------------|
|                                                                         | CH <sub>4</sub> | CO <sub>2</sub> | Electricity | Steam | H <sub>2</sub> | CO <sub>2</sub> |
|                                                                         | MJ              | kg              | kWh         | kWh   | kg             | kg              |
| IIIa – electrically heated reactor (CO <sub>2</sub> RRECT) <sup>4</sup> | 13.02           | 0.910           | 1.98        | --    | 0.050          | 0.053           |
| IIIb – reactor heated by steam                                          | 13.02           | 0.910           | 0.76        | 1.22  | 0.050          | 0.053           |

**Table S5: CO<sub>2</sub>-based methanol production (values per kg methanol)**

| Process                                     | Inputs         |                 |             |       | Emissions       |
|---------------------------------------------|----------------|-----------------|-------------|-------|-----------------|
|                                             | H <sub>2</sub> | CO <sub>2</sub> | Electricity | Steam | CO <sub>2</sub> |
|                                             | kg             | kg              | kWh         | kWh   | kg              |
| IVa (Rihko-Struckmann et al.) <sup>10</sup> | 0.197          | 1.436           | 1.34        | --    | 0.062           |
| IVb (Van-Dal et al.) <sup>11</sup>          | 0.204          | 1.484           | 0.69 (0.30) | --    | 0.112           |
| IVc (Kiss et al.) <sup>12</sup>             | 0.189          | 1.376           | 0.67 (0.55) | 0.37  | 0.002           |

IVb) original inlet pressures: p H<sub>2</sub> = 30 bar & p CO<sub>2</sub> = 1 bar;

IVc) original inlet pressures p H<sub>2</sub> = 1.1 bar & p CO<sub>2</sub> = 100 bar

**Table S6: CO<sub>2</sub>-based methane production (values per GJ SNG based on LHV)**

| Process                                 | Inputs         |                 |               | Emissions       |
|-----------------------------------------|----------------|-----------------|---------------|-----------------|
|                                         | H <sub>2</sub> | CO <sub>2</sub> | Electricity   | CO <sub>2</sub> |
|                                         | kg             | kg              | kWh           | kg              |
| Va (Müller et al.) <sup>13</sup>        | 9.97           | 57.53           | 19.31 (6.38)  | 3.79            |
| Vb (De Saint Jean et al.) <sup>14</sup> | 10.04          | 55.46           | 54.14 (40.41) | 0.90            |

Va) original inlet pressures: p H<sub>2</sub> = 30 bar & p CO<sub>2</sub> = 1 bar;

Vb) original inlet pressures: p H<sub>2</sub> = 7.4 bar & p CO<sub>2</sub> = 100 bar

Both CO<sub>2</sub>-based processes for methane produce so-called substitute natural gas (SNG). The main component of SNG is methane (> 85 vol-%). Furthermore, SNG contains H<sub>2</sub> and CO<sub>2</sub>. The H<sub>2</sub> contributes to the energy content of SNG. The CO<sub>2</sub> is considered as emission.

**Table S7: Fossil-based production of C1-chemicals (values per kg C1-chemical)**

| Process                                  | Inputs          |       |                  |                    | Outputs  | Emissions       | Comment                  |
|------------------------------------------|-----------------|-------|------------------|--------------------|----------|-----------------|--------------------------|
|                                          | CH <sub>4</sub> | CO    | Electricity      | Heat               | Hydrogen | CO <sub>2</sub> |                          |
|                                          | MJ              | kg    | kWh              | kWh                | kg       | kg              |                          |
| HCOOH (REF <sup>15</sup> ) <sup>a)</sup> | --              | 0.614 | 0.13             | 5.35 <sup>c)</sup> | --       | 0.010           |                          |
| CO (REF <sup>4</sup> )                   | 36.20           | --    | 0.89             | 2.38 <sup>d)</sup> | 0.216    | 0.414           | H <sub>2</sub> /CO = 3   |
| CO <sup>b)</sup>                         | 40.43           | --    | 0.41             | 6.60 <sup>d)</sup> | 0.317    | 0.646           | H <sub>2</sub> /CO = 4.4 |
| CH <sub>3</sub> OH (Ref <sup>16</sup> )  | 25.00           | --    | 0.43             | 0.97 <sup>d)</sup> | --       | --              | High-efficiency          |
| CH <sub>3</sub> OH (Ref <sup>16</sup> )  | 25.00           | --    | -- <sup>e)</sup> | 3.25 <sup>d)</sup> | --       | --              | Low-efficiency           |

a) purity of formic acid is not mentioned in reference; carbon balance indicates that results are presented per kg pure formic acid

b) data for syngas production from Baltrusaitis and Luyben,<sup>9</sup> and energy demand for carbon monoxide separation from Lyke and Moore<sup>17</sup>

c) value represents steam demand

d) value represents natural gas demand

e) required electricity is internally produced from excess steam

### S3. LCA data

In Table S8 the considered LCA data sets are presented.

**Table S8: Considered LCA data sets**

| Product     | Name of data set                                    | Year | Database |
|-------------|-----------------------------------------------------|------|----------|
| Heat        | steam from natural gas (efficiency 90 %) [EU-27]    | 2012 | GaBi ts  |
| Heat        | steam from natural gas (efficiency 90 %) [NL]       | 2012 | GaBi ts  |
| Heat        | steam from natural gas (efficiency 90 %) [PT]       | 2012 | GaBi ts  |
| Natural gas | natural gas mix [EU-27]                             | 2012 | GaBi ts  |
| Natural gas | natural gas mix [NL]                                | 2012 | GaBi ts  |
| Natural gas | natural gas mix [PT]                                | 2012 | GaBi ts  |
| Hydrogen    | hydrogen from steam reforming - natural gas [DE]    | 2012 | GaBi ts  |
| Electricity | electricity from wind power [EU-27]                 | 2012 | GaBi ts  |
| Electricity | electricity from photovoltaics [DE]                 | 2012 | GaBi ts  |
| Electricity | electricity generation mix [all countries of EU-27] | 2012 | GaBi ts  |
| Electricity | electricity mix 2020 (average power plant) [EU-27]  | 2015 | GaBi ts  |
| Electricity | electricity mix 2040 (average power plant) [EU-27]  | 2015 | GaBi ts  |
| Electricity | electricity mix 2050 (average power plant) [EU-27]  | 2015 | GaBi ts  |

#### S4. Breakdown of fossil depletion impacts for CO<sub>2</sub>-based processes

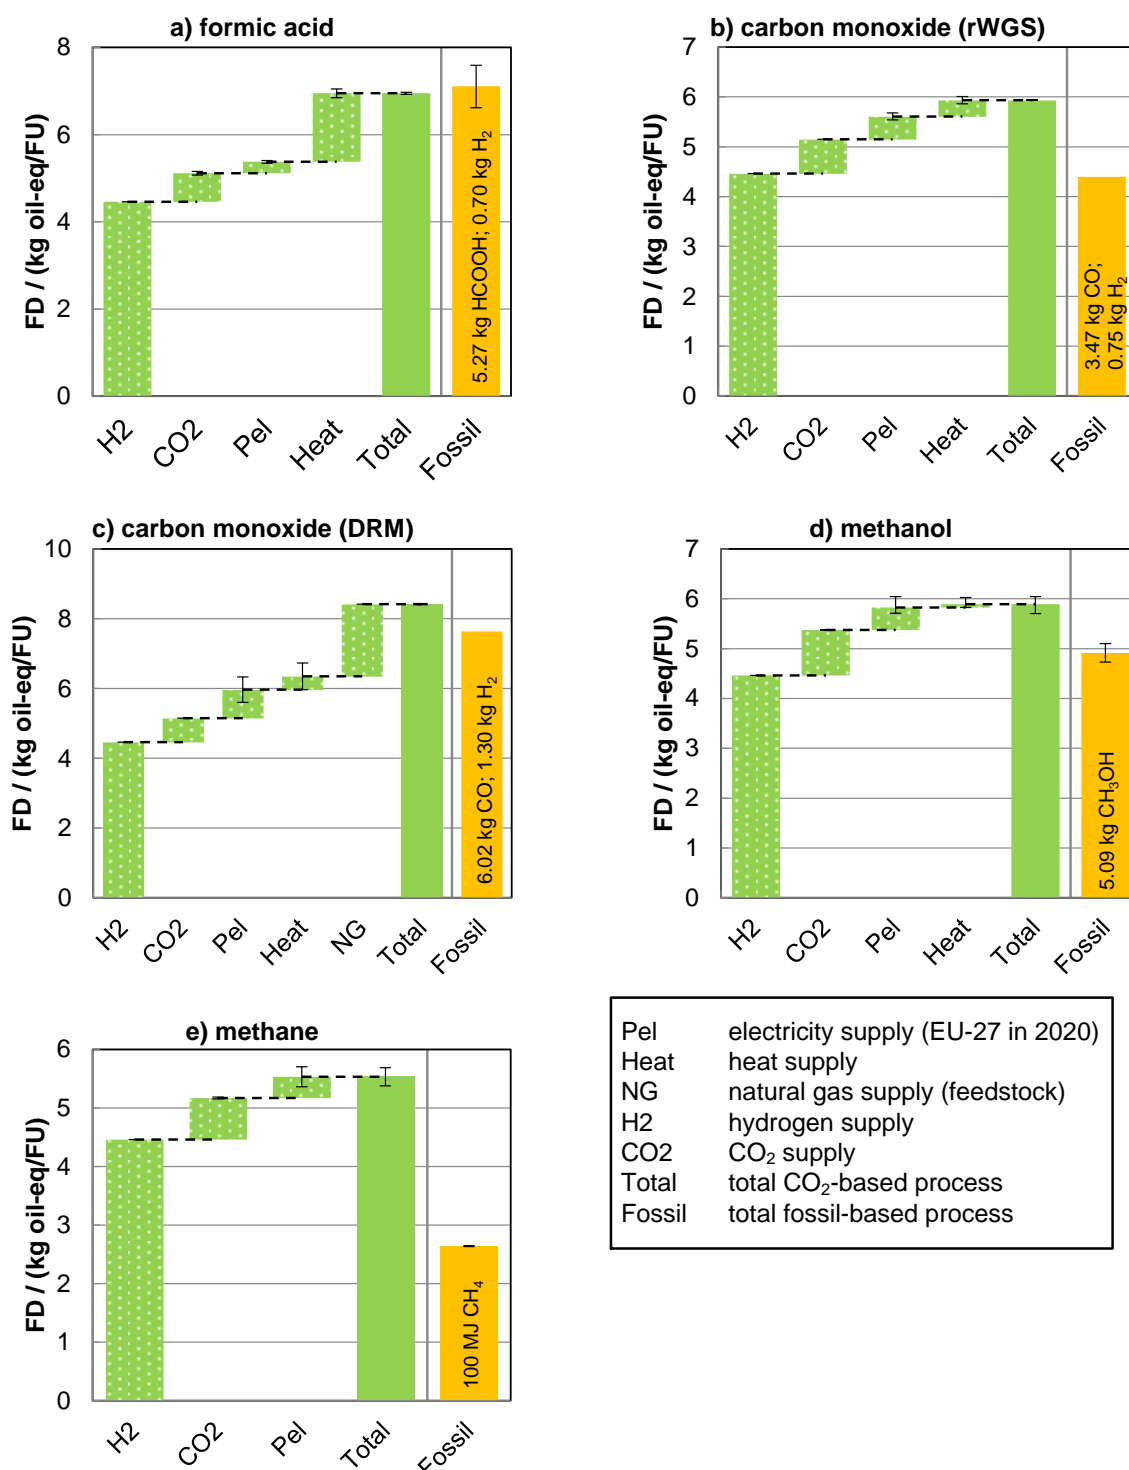

**Figure S1: Breakdown of fossil depletion (FD) impacts per functional unit (FU = use of 1kg hydrogen) for CO<sub>2</sub>-based processes for a) formic acid, b) carbon monoxide via rWGS, c) carbon monoxide via DRM, d) methanol and e) methane. For CO<sub>2</sub> supply, a fossil depletion impact of 0.13 kg Oil-eq/kg CO<sub>2</sub> is considered. The hydrogen is supplied by fossil-based steam-methane-reforming. The error bars of the CO<sub>2</sub>-based processes represent the range of considered process concepts. The right bar represents fossil-based processes with an upper bound of fossil depletion impacts (worst case). The range of the fossil-based processes is due to different yields of C1-chemicals from the considered CO<sub>2</sub>-based processes. The average yield is shown in the right bar.**

## S5. Breakdown of global warming and fossil depletion impacts for fossil-based processes

In this section, the breakdown of global warming and fossil depletion impacts is shown for fossil-based processes per functional unit. For formic acid, methanol and methane, the average yield of C1-chemicals from Table S9 is considered. The average yield of each considered C1-chemical is presented in Figure S1.

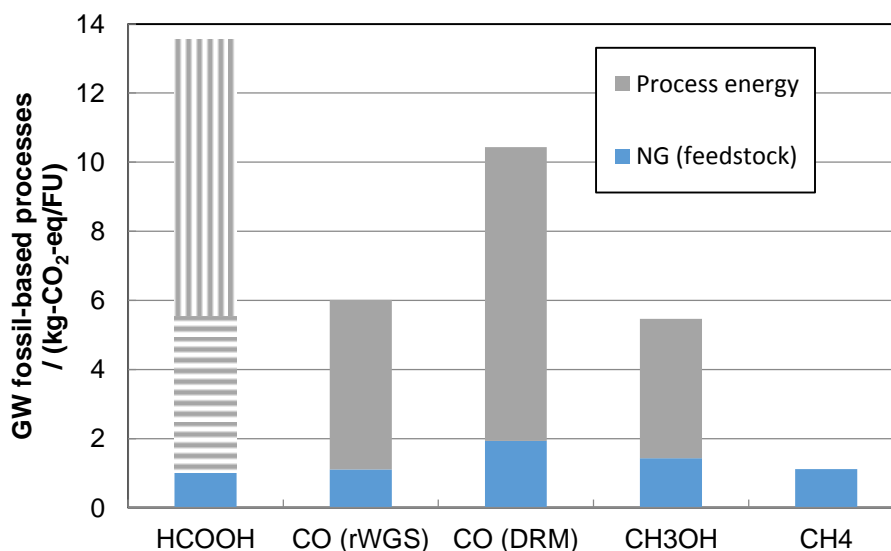

**Figure S2: Breakdown of global warming impacts (GW) for fossil-based processes per functional unit (FU).** For formic acid, the process energy (heat and electricity) demand is divided in production of the precursor carbon monoxide (horizontal lines) and the conversion of carbon monoxide to formic acid (vertical lines). The global warming impacts of NG (feedstock) include upstream processes such as transportation and natural gas purification. For fossil-based carbon monoxide, the difference between CO (rWGS) and CO (DRM) is due to different product yields of the CO<sub>2</sub>-based processes (rWGS and DRM).

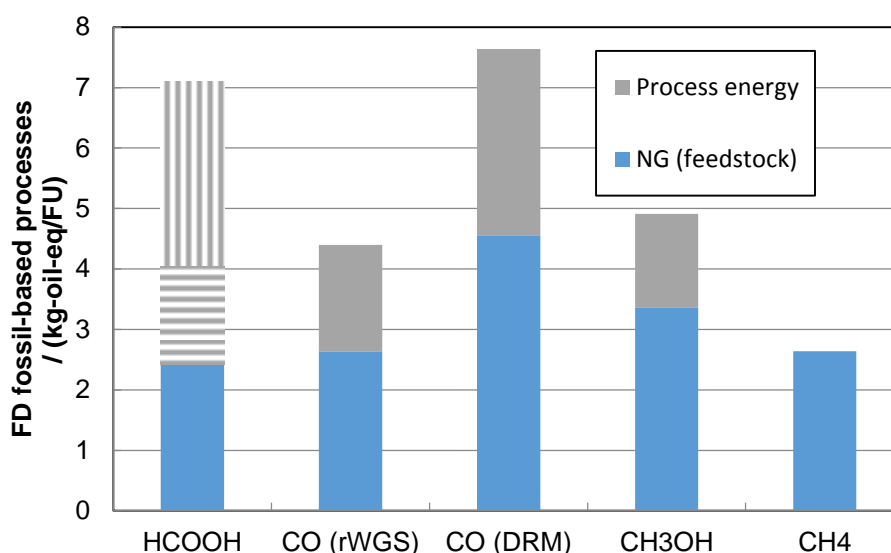

**Figure 3: Breakdown of fossil depletion impacts (FD) for fossil-based processes per functional unit (FU).** For formic acid (HCOOH), the process energy (heat and electricity) demand is divided in production of the precursor carbon monoxide (horizontal lines) and the conversion of carbon monoxide to formic acid (vertical lines). The fossil depletion impacts of NG (feedstock) include upstream processes such as transportation and natural gas purification.

**Table S9: Yield of chemicals for considered CO<sub>2</sub>-based processes per functional unit (use of 1 kg hydrogen)**

|                        | C1-chemical<br>in kg | Hydrogen<br>in kg | C1-chemical<br>in mol | Hydrogen<br>in mol |
|------------------------|----------------------|-------------------|-----------------------|--------------------|
| Formic acid            | 4.91-5.63            | 0.65-0.75         | 107-122               | 323-370            |
| Carbon monoxide (rWGS) | 3.47                 | 0.75              | 124                   | 372                |
| Carbon monoxide (DRM)  | 6.02                 | 1.30              | 215                   | 645                |
| Methanol               | 4.90-5.29            | --                | 153-165               | --                 |
| Methane <sup>a)</sup>  | 1.97-1.99            | 0.004-0.017       | 123-124               | 2-8                |

a) Corresponds to 99.6-100.3 MJ based on lower heating value (LHV)

**Table S10: Input and output (negative values) of hydrogen in mol for CO<sub>2</sub>-based and fossil-based processes of C1-chemicals based on process simulations (data from Tables S2 - S7) and stoichiometric data (see Figure 2 in main text). For the CO<sub>2</sub>-based production of CO via DRM, the production of 2 mol CO is considered because thereby we ensure that all CO<sub>2</sub>-based processes use 1 mol CO<sub>2</sub> and substitute 1 mol fossil-based methane. The CO<sub>2</sub>-based production of CO via DRM substitutes 2 mol fossil-based CO but requires 1 mol methane as feedstock. For the fossil-based production of methanol (process data), the hydrogen output is 0 because the co-produced hydrogen is not purified in the considered process concepts and thus not available as by-product.**

|                                                         | Formic acid<br>1 mol | CO (rWGS)<br>1 mol | CO (DRM)<br>2 mol | Methanol<br>1 mol | Methane<br>1 mol |
|---------------------------------------------------------|----------------------|--------------------|-------------------|-------------------|------------------|
| <b>Data based on process simulations</b>                |                      |                    |                   |                   |                  |
| CO <sub>2</sub> -based                                  | 1.03-1.62            | 1.00               | -1.39             | 3.01-3.24         | 4.00-4.03        |
| Fossil-based                                            | -3.02                | -3.00              | -6.00             | 0.00              | 0.00             |
| <b>Total</b><br>(CO <sub>2</sub> -based – Fossil-based) | <b>4.05-4.64</b>     | <b>4.00</b>        | <b>4.61</b>       | <b>3.01-3.24</b>  | <b>4.00-4.03</b> |
| <b>Stoichiometric data</b>                              |                      |                    |                   |                   |                  |
| CO <sub>2</sub> -based                                  | 1                    | 1                  | -2                | 3                 | 4                |
| Fossil-based                                            | -3                   | -3                 | -6                | 1                 | 0                |
| <b>Total</b><br>(CO <sub>2</sub> -based – Fossil-based) | <b>4</b>             | <b>4</b>           | <b>4</b>          | <b>4</b>          | <b>4</b>         |



## S6. Maximum impact reductions for global warming including CO<sub>2</sub> supply from CCS

In the main text (Figure 5), a range of global warming impacts for CO<sub>2</sub> supply is considered from  $-0.42$  to  $-0.99$  kg CO<sub>2</sub>-eq/kg CO<sub>2</sub>. In Figure S4, a range of global warming impacts for CO<sub>2</sub> supply is considered from 0 to  $-1$  kg CO<sub>2</sub>-eq/kg CO<sub>2</sub>. A global warming impact of zero for CO<sub>2</sub> supply corresponds to the utilization of CO<sub>2</sub> that otherwise would be stored in the underground (CCS).

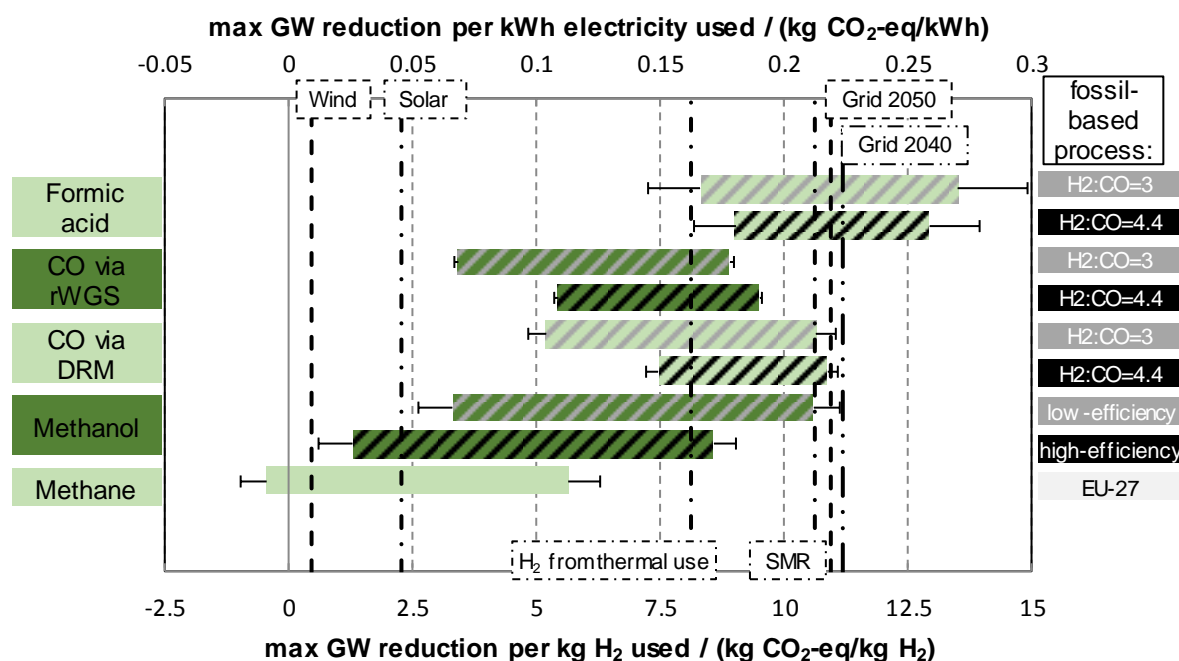

Figure S4: Maximum global warming (GW) impact reductions including CO<sub>2</sub> supply from CCS. For further explanation of the Figure, see caption of Figure 5 in main text.

## S7. Maximum environmental impact reductions for alternative natural gas supply

In the main text, the maximum environmental impact reductions for global warming and fossil depletion are determined by considering the natural gas supply mix in the EU-27. In this section, the maximum environmental impact reductions for global warming and fossil depletion are presented for natural gas mixes of countries with highest (Portugal) and lowest (The Netherlands) environmental impacts in the EU-27.

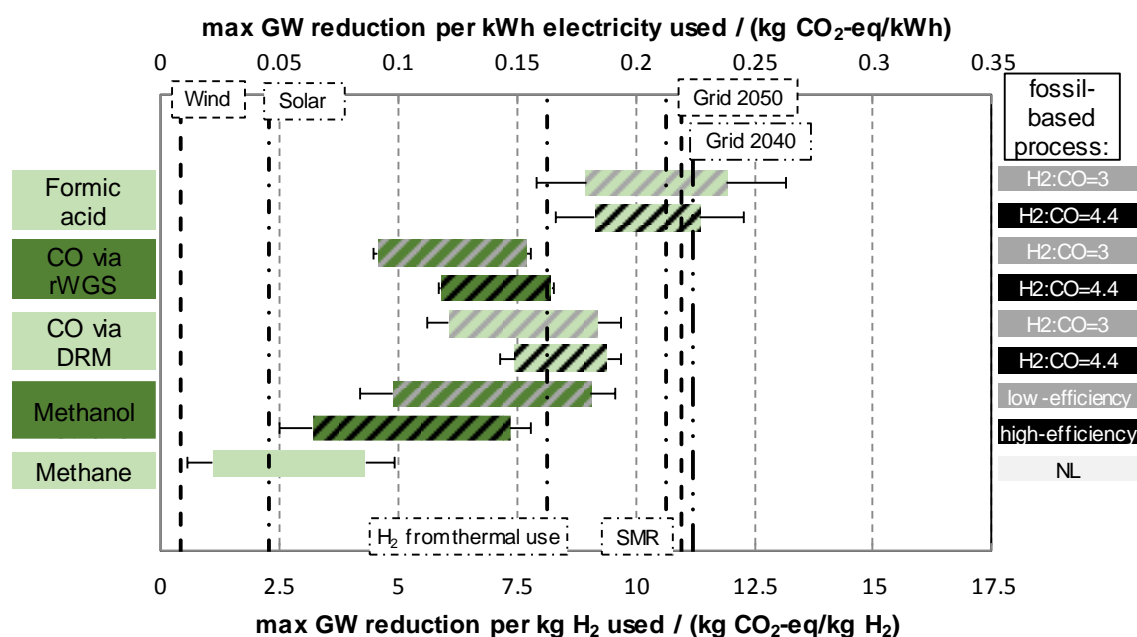

Figure S5: Maximum global warming (GW) impact reductions for the Dutch natural gas mix. For further explanation of the Figure, see caption of Figure 5 in main text.

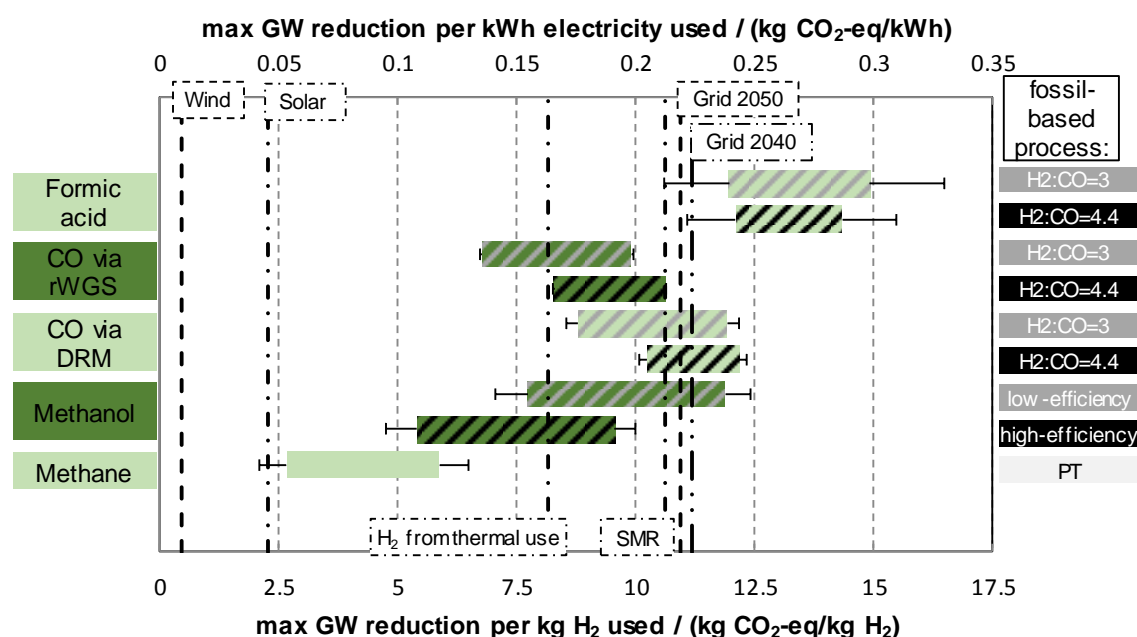

Figure S6: Maximum global warming (GW) impact reductions for the Portuguese natural gas mix. For further explanation of the Figure, see caption of Figure 5 in main text.

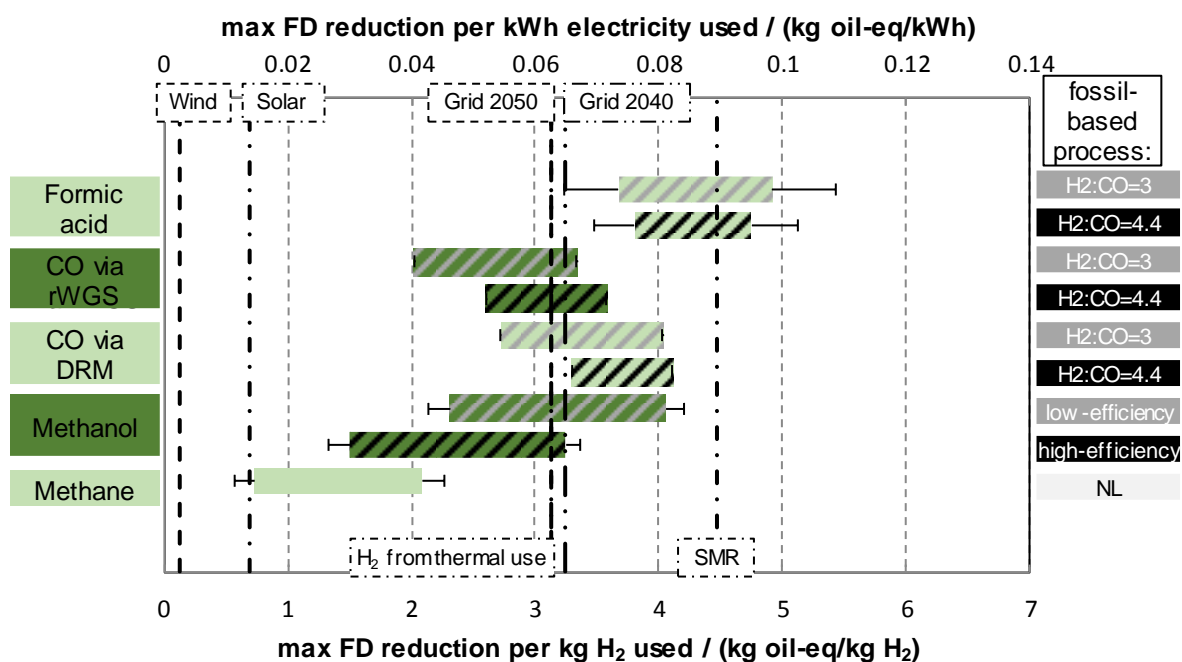

Figure S7: Maximum fossil depletion (FD) impact reductions for the Dutch natural gas mix. For further explanation of the Figure, see caption of Figure 6 in main text.

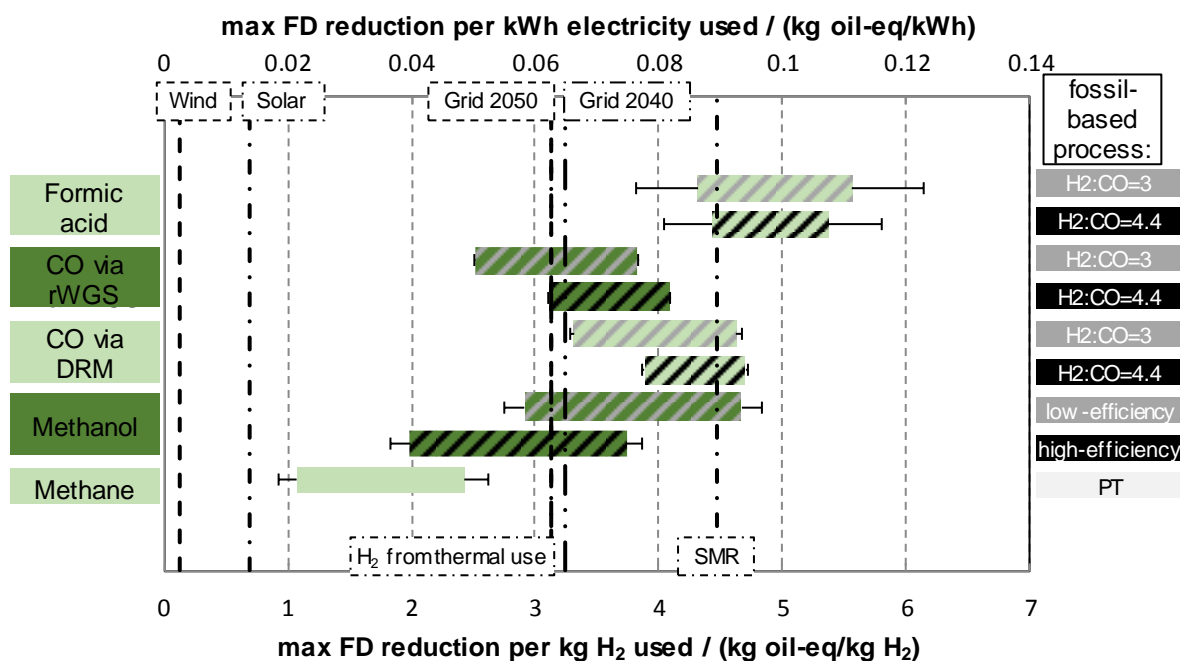

Figure S8: Maximum fossil depletion (FD) impact reductions for the Portuguese natural gas mix. For further explanation of the Figure, see caption of Figure 6 in main text.

## S8. Calculation details for CO<sub>2</sub>-based process for formic acid (Jens and co-workers)<sup>3</sup>

Simulation was performed with Aspen Plus based on assumptions and physical properties as shown in details below.

### Flow sheets

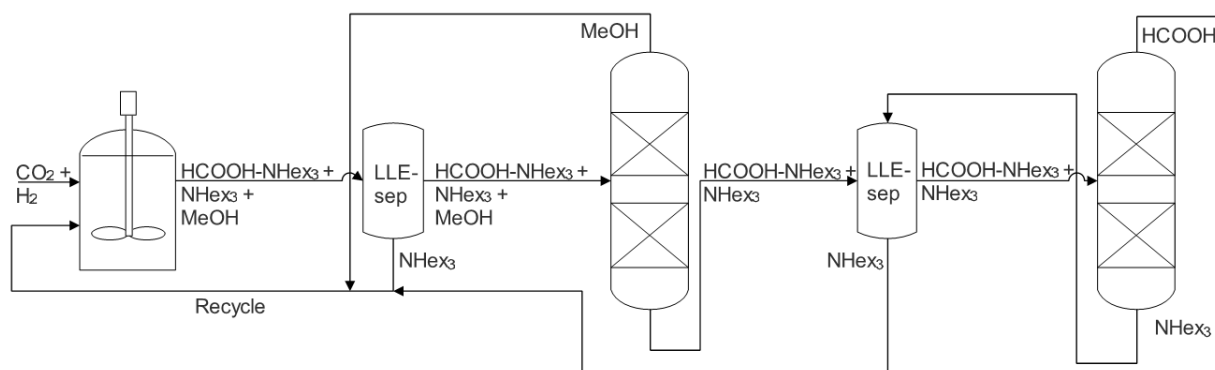

Figure S9: Process flow sheet for NHex<sub>3</sub>-based process

### Physical properties

Table S11: References for physical properties of pure components; COSMO-RS Version: COSMOthermX15 with parameterization TZVPD-FINE

| Component               | $C_p$                              | $\Delta H_{\text{vap}}$ | $p_{\text{vap}}$ | Molar volume                  |
|-------------------------|------------------------------------|-------------------------|------------------|-------------------------------|
| HCOOH                   | Aspen database                     | Aspen database          | Aspen database   | Aspen database                |
| NHex <sub>3</sub>       | Góralski et al. <sup>18</sup>      | COSMO-RS                | COSMO-RS         | Góralski et al. <sup>18</sup> |
| Methanol                | Aspen database                     | Aspen database          | Aspen database   | Aspen database                |
| HCOOH-NHex <sub>3</sub> | Sum of NHex <sub>3</sub> and HCOOH | COSMO-RS                | COSMO-RS         | Same as NHex <sub>3</sub>     |

The reference for the physical properties of all considered mixtures is COSMOthermX15 with TZVP-FINE parameterization. The HCOOH-NHex<sub>3</sub> complex was implemented with COSMOconfX13.

## Assumptions for process simulation

**Table S12: Assumptions for process simulation of NHex<sub>3</sub>-based process and corresponding references**

| Assumption                                                                                                      | Reference                                                                                                                                                                                          |
|-----------------------------------------------------------------------------------------------------------------|----------------------------------------------------------------------------------------------------------------------------------------------------------------------------------------------------|
| <b>Reactor</b>                                                                                                  |                                                                                                                                                                                                    |
| Pressure (CO <sub>2</sub> and H <sub>2</sub> ), temperature, reaction yields                                    | Patent of Schaub et al. <sup>19</sup>                                                                                                                                                              |
| Enthalpy of reaction                                                                                            | Schaub and Paciello <sup>2</sup>                                                                                                                                                                   |
| Solvent effect on the enthalpy of reaction                                                                      | COSMO-RS                                                                                                                                                                                           |
| <b>LLE separation</b>                                                                                           |                                                                                                                                                                                                    |
| Partition coefficients are based on:                                                                            |                                                                                                                                                                                                    |
| <ul style="list-style-type: none"><li>• experimental data if available</li><li>• prediction otherwise</li></ul> | Patent of Schaub et al. <sup>19</sup><br>COSMO-RS                                                                                                                                                  |
| <b>Distillation</b>                                                                                             |                                                                                                                                                                                                    |
| Temperature and pressure                                                                                        | Patent of Schaub et al. <sup>19</sup>                                                                                                                                                              |
| Reflux ratio; reboiler/condenser heating/cooling                                                                | RADFRAC Model in Aspen Plus; Number of stages and feed tray are varied to minimize energy demand                                                                                                   |
| Reactive distillation                                                                                           | Approximated as combination of reactor (with full conversion) at distillation conditions and a RADFRAC distillation. <sup>1</sup> Solvent correction on heat of reaction calculated with COSMO-RS. |

## S9. References

- (1) M. Pérez-Fortes, J. C. Schöneberger, A. Boulamanti, G. Harrison and E. Tzimas, *Int. J. Hydrogen Energy*, 2016, **41**, 16444–16462.
- (2) T. Schaub and R. A. Paciello, *Angew. Chem. Int. Ed.*, 2011, **50**, 7278–7282.
- (3) C. M. Jens, M. Scott, B. Liebergesell, P. Schäfer, G. Franciò, W. Leitner, K. Leonhard and A. Bardow, *in preparation*, 2017.
- (4) CO<sub>2</sub>RRECT, *CO<sub>2</sub>-Reaction using Regenerative Energies and Catalytic Technologies*, Bayer Technology Services, Final project report (ref. no. 033RC1006), 2014.
- (5) W. Haije and H. Geerlings, *Environ. Sci. Technol.*, 2011, **45**, 8609–8610.
- (6) C. van der Giesen, R. Kleijn and G. J. Kramer, *Environ. Sci. Technol.*, 2014, **48**, 7111–7121.
- (7) I. Dimitriou, P. Garcia-Gutierrez, R. H. Elder, R. M. Cuellar-Franca, A. Azapagic and R. W. K. Allen, *Energy Environ. Sci.*, 2015, **8**, 1775–1789.
- (8) D. H. König, N. Baucks, R.-U. Dietrich and A. Wörner, *Energy*, 2015, **91**, 833 – 841.
- (9) J. Baltrusaitis and W. L. Luyben, *ACS Sustainable Chem. Eng.*, 2015, **3**, 2100–2111.
- (10) L. K. Rihko-Struckmann, A. Peschel, R. Hanke-Rauschenbach and K. Sundmacher, *Ind. Eng. Chem. Res.*, 2010, **49**, 11073–11078.
- (11) E. S. Van-Dal and C. Bouallou, *J. Clean. Prod.*, 2013, **57**, 38 – 45.
- (12) A. A. Kiss, J. Pragt, H. Vos, G. Bargeman and M. de Groot, *Chem. Eng. J.*, 2016, **284**, 260 – 269.
- (13) B. Müller, K. Müller, D. Teichmann and W. Arlt, *Chem. Ing. Tech.*, 2011, **83**, 2002–2013 (in German).
- (14) M. D. S. Jean, P. Baurens and C. Bouallou, *Int. J. Hydrogen Energy*, 2014, **39**, 17024–17039.
- (15) ecoinvent, *Life Cycle Inventories of Petrochemical Solvents*, Swiss Centre for Life Cycle Inventories, ecoinvent report No. 22, 2007.
- (16) ecoinvent, *Life Cycle Inventories of Chemicals*, Swiss Centre for Life Cycle Inventories, ecoinvent report No. 8, 2007.
- (17) S. E. Lyke and R. H. Moore, *Chemical Production From Industrial Byproduct Gases: Final Report*, U.S. Department of Energy Technical Report PNL-3753, 1981.
- (18) P. Góralski, M. Wasiak and A. Bald, *J. Chem. Eng. Data*, 2002, **47**, 83–86.
- (19) T. Schaub, O. Bey, A. Meier, D. M. Fries and R. Hugo, WO 2013050367, 2013.
